# Supplementary material for: Metabolomics-based model for early warning of acute kidney injury risk in diquat-exposed patients
Source: Research Square preprint supplement (doi:10.21203/rs.3.rs-4552912/v1), 2024-07-01
Supplement: Supplementary file 1 [file 325c82fb60e1ba5a7d289f45.xlsx]

## Sheet: Sheet1
	Predictions
Realities	A	B	C	Correct percentage
A	13	0	0	1
B	0	16	3	0.842
C	0	3	18	0.857
Overall percentage	0.245	0.358	0.396	0.887
