# Supplementary material for: Metabolomics-based model for early warning of acute kidney injury risk in diquat-exposed patients
Source: Research Square preprint supplement (doi:10.21203/rs.3.rs-4552912/v1), 2024-07-01
Supplement: Supplementary file 2 [file 4cf26617c24525e5b503a067.xlsx]

## Sheet: Sheet1
Information	Control (n=13)		DQ (n=40)	P (Control vs. DQ)	DQ-N (n=19)	DQ-A (n=21)		P (DQ-N vs. DQ-A)
Age (years)		43 (34~46)	29 (19~34.5)	0.0108	27 (17.5~31)		29 (23~36)	0.5687
Male/female		8/5	14/26	-	6/13		8/13	-
Creatinine concentration(μg/mL)		-	70 (46.5~132)	-	59 (45~95.5)		90.5 (49.25~236.5)*	0.0737
DQ concentration (μg/mL)		-	1.5 (0.375~2.7)	-	0.6 (0.275~1.2)		2 (0.8~6)	0.0431
