# Supplementary material for: Metabolomics-based model for early warning of acute kidney injury risk in diquat-exposed patients
Source: Research Square preprint supplement (doi:10.21203/rs.3.rs-4552912/v1), 2024-07-01
Supplement: Supplementary file 4 [file fb8ab16f24b8839ef9943abe.xlsx]

## Sheet: Sheet1
No	m/z	P value	HMDB	Metabolite	ESI+/ESI-
1	455.085	<0.05	HMDB0000797	SAICAR	ESI+
2	428.034	<0.05	HMDB0001341	ADP	ESI+
3	606.07	<0.05	HMDB0003351	GDP-glucose	ESI+
4	799.637	<0.05	HMDB0013467	Hydroxysphingomyeline C22:2	ESI+
5	298.13	<0.05	HMDB0010323	Phenethylamine glucuronide	ESI+
6	336.082	<0.05	HMDB0001550	S-Formylglutathione	ESI+
7	118.048	<0.05	HMDB0012249	L-Aspartate-semialdehyde	ESI+
8	497.136	<0.05	HMDB0060330	1-Nitro-7-hydroxy-8-glutathionyl-7,8-dihydronaphthalene	ESI+
9	117.054	<0.05	HMDB0012233	Glutarate semialdehyde	ESI+
10	744.616	<0.05	HMDB0000770	N-Glycoloylganglioside GM2	ESI+
11	927.619	<0.05	HMDB0001469	Undecaprenyl diphosphate	ESI+
12	251.069	<0.05	HMDB0001049	gamma-Glutamylcysteine	ESI+
13	201.179	<0.05	HMDB0000638	Dodecanoic acid	ESI+
14	118.048	<0.05	HMDB0006454	L-2-Amino-3-oxobutanoic acid	ESI+
15	308.065	<0.05	HMDB0001202	dCMP	ESI+
16	268.097	<0.05	HMDB0000830	Neuraminic acid	ESI+
17	115.038	<0.05	HMDB0060461	cis-Acetylacrylate	ESI+
18	801.653	<0.05	HMDB0013466	Hydroxysphingomyeline C22:1	ESI+
19	1022.32	<0.05	HMDB0003932	(S)-3-Hydroxyhexadecanoyl-CoA	ESI+
20	1058.29	<0.05	HMDB0060377	3-Oxo-OPC8-CoA	ESI+
21	415.084	<0.05	HMDB0060316	(7R)-7-(5-Carboxy-5-oxopentanoyl)aminocephalosporinate	ESI+
22	1052.31	<0.05	HMDB0060311	(5Z,8Z,11Z,14Z,17Z)-Icosapentaenoyl-CoA	ESI+
23	478.082	<0.05	HMDB0000632	Dermatan sulfate	ESI+
24	1028.32	<0.05	HMDB0006368	Gamma-linolenoyl-CoA	ESI+
25	585.267	<0.05	HMDB0000054	Bilirubin	ESI+
26	400.338	<0.05	HMDB0000222	Palmitoylcarnitine	ESI+
27	1004.34	<0.05	HMDB0003945	(2E)-Hexadecenoyl-CoA	ESI+
28	1006.34	<0.05	HMDB0001338	Palmityl-CoA	ESI+
29	1030.33	<0.05	HMDB0001064	Linoleoyl-CoA	ESI+
30	1026.32	<0.05	HMDB0006519	Stearidonoyl CoA	ESI+
31	248.143	<0.05	HMDB0013127	3-Hydroxybutyrylcarnitine	ESI+
32	120.997	<0.05	HMDB0001368	3-Mercaptopyruvic acid	ESI+
33	428.038	<0.05	HMDB0000960	dGDP	ESI+
34	261.084	<0.05	HMDB0341384	pyroglutamylmethionine	ESI+
35	575.208	<0.05	HMDB0006825	Tetrahydrofolyl-[Glu](2)	ESI+
36	305.054	<0.05	HMDB0001570	Thymidine 3',5'-cyclic monophosphate	ESI+
37	118.086	<0.05	HMDB0003355	5-Aminopentanoic acid	ESI+
38	215.13	<0.05	HMDB0241037	5-Methylhexanoylcarnitine	ESI+
39	225.09	<0.05	HMDB0000732	Hydroxykynurenine	ESI+
40	330.059	<0.05	HMDB0000058	Cyclic AMP	ESI+
41	242.121	<0.05	HMDB0000027	Tetrahydrobiopterin	ESI+
42	333.069	<0.05	HMDB0006555	dIMP	ESI+
43	311.144	<0.05	HMDB0241269	Dodeca-5,7-dienedioylcarnitine	ESI+
44	474.36	<0.05	HMDB0242169	Adrenoylcarnitine	ESI-
45	502.392	<0.05	HMDB0060158	Tetracosatetraenoyl carnitine	ESI-
46	396.272	<0.05	HMDB0013628	PGF2a ethanolamide	ESI-
47	369.242	<0.05	HMDB0000476	3-Oxo-4,6-choladienoic acid	ESI-
48	482.297	<0.05	HMDB0000722	Lithocholyltaurine	ESI-
