# Supplementary figures and images for: Metabolomics-based model for early warning of acute kidney injury risk in diquat-exposed patients
Source: Research Square preprint supplement (doi:10.21203/rs.3.rs-4552912/v1), 2024-07-01

**Graphical Abstract**


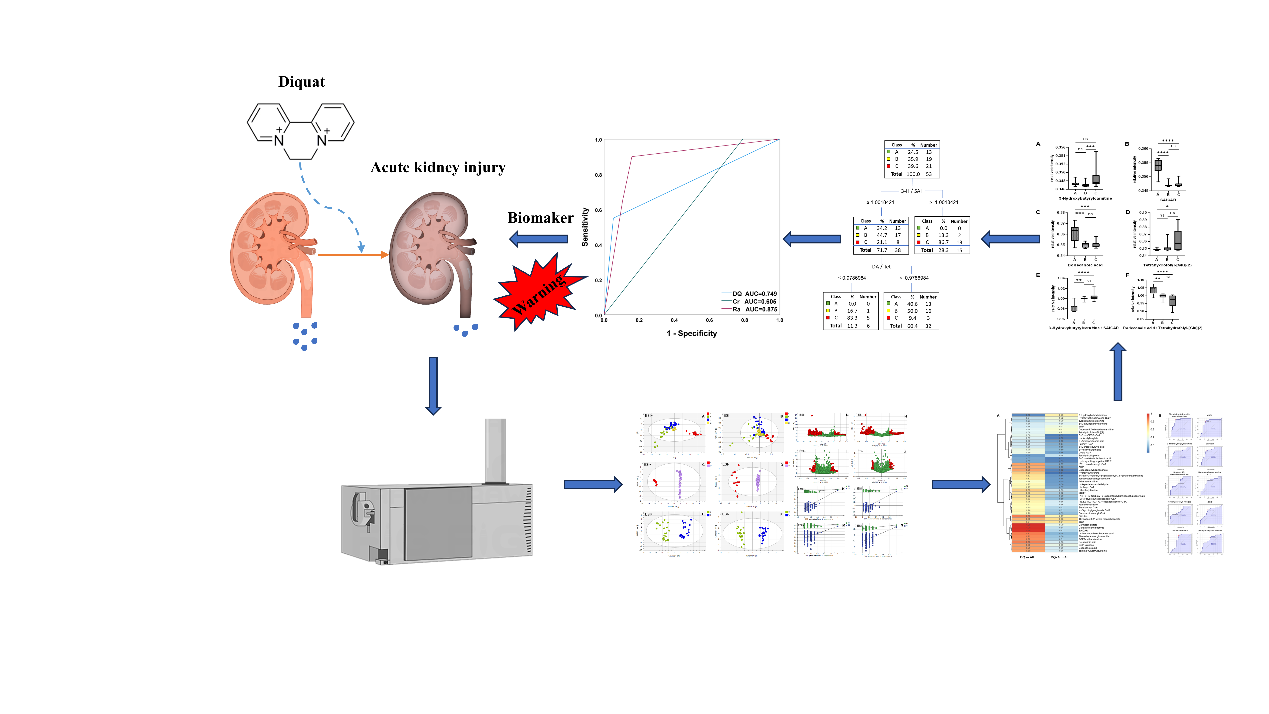
 **Figure1**


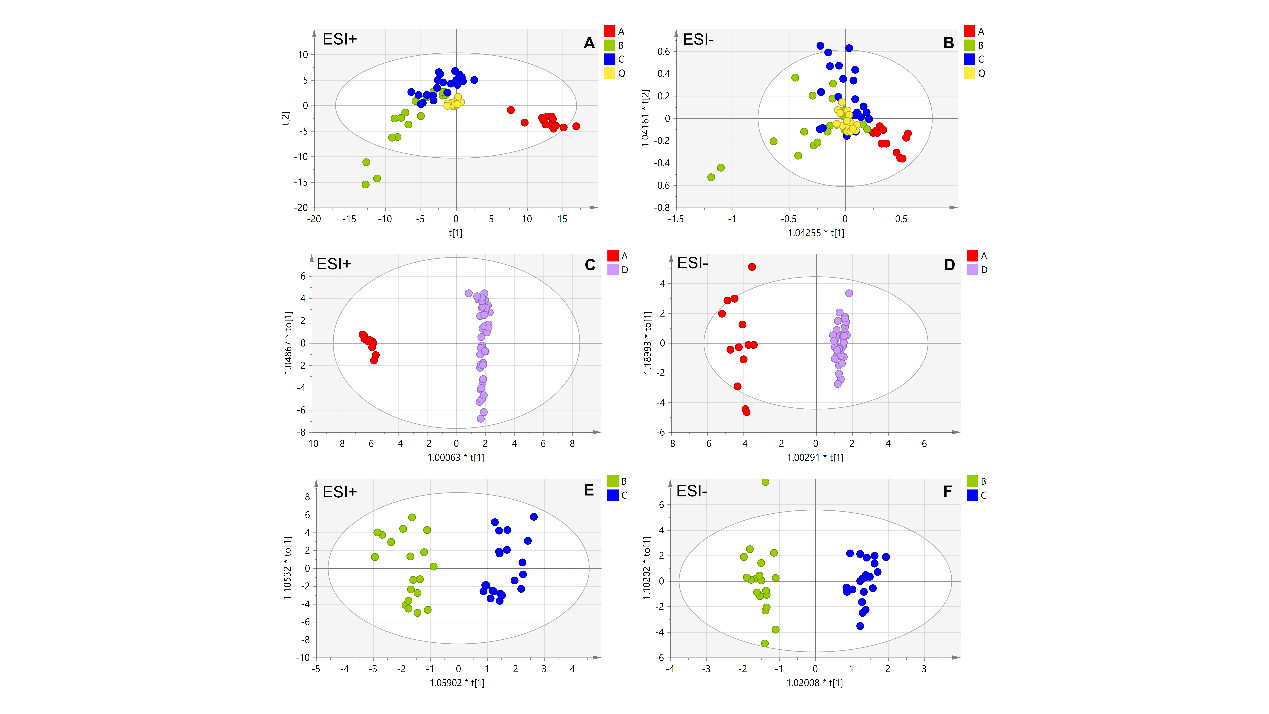


**Figure2**
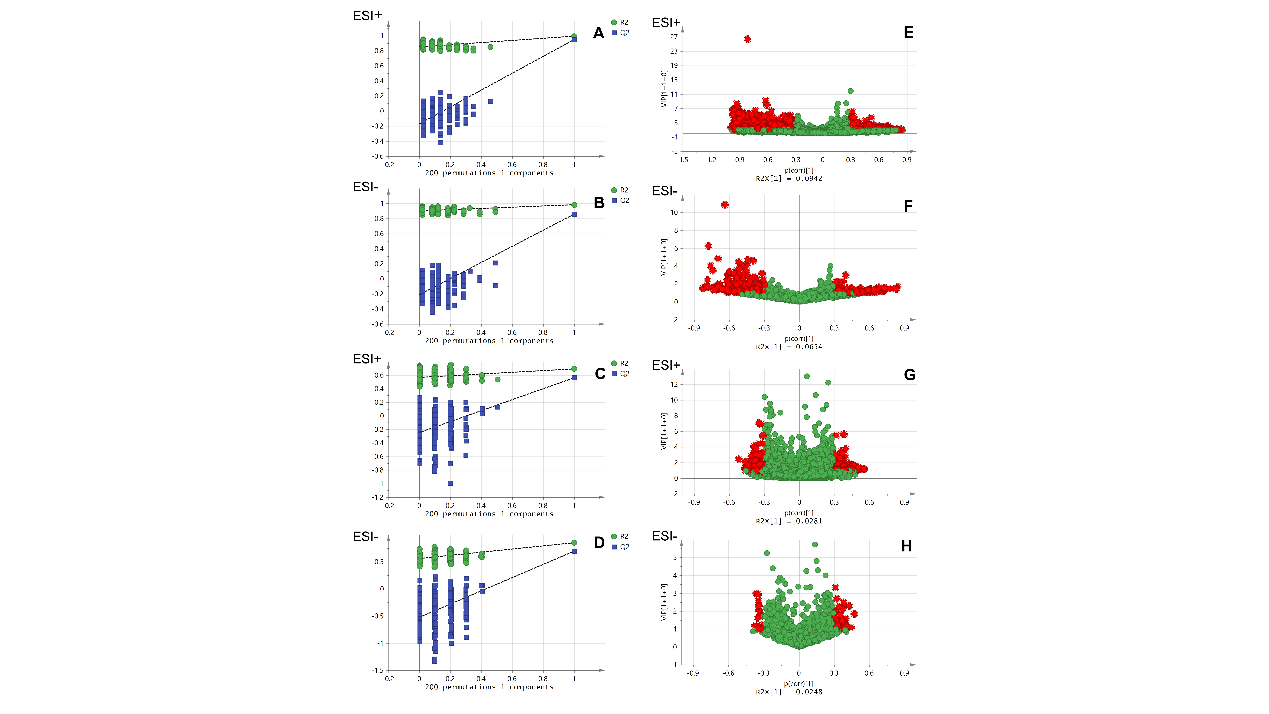


**Figure3**
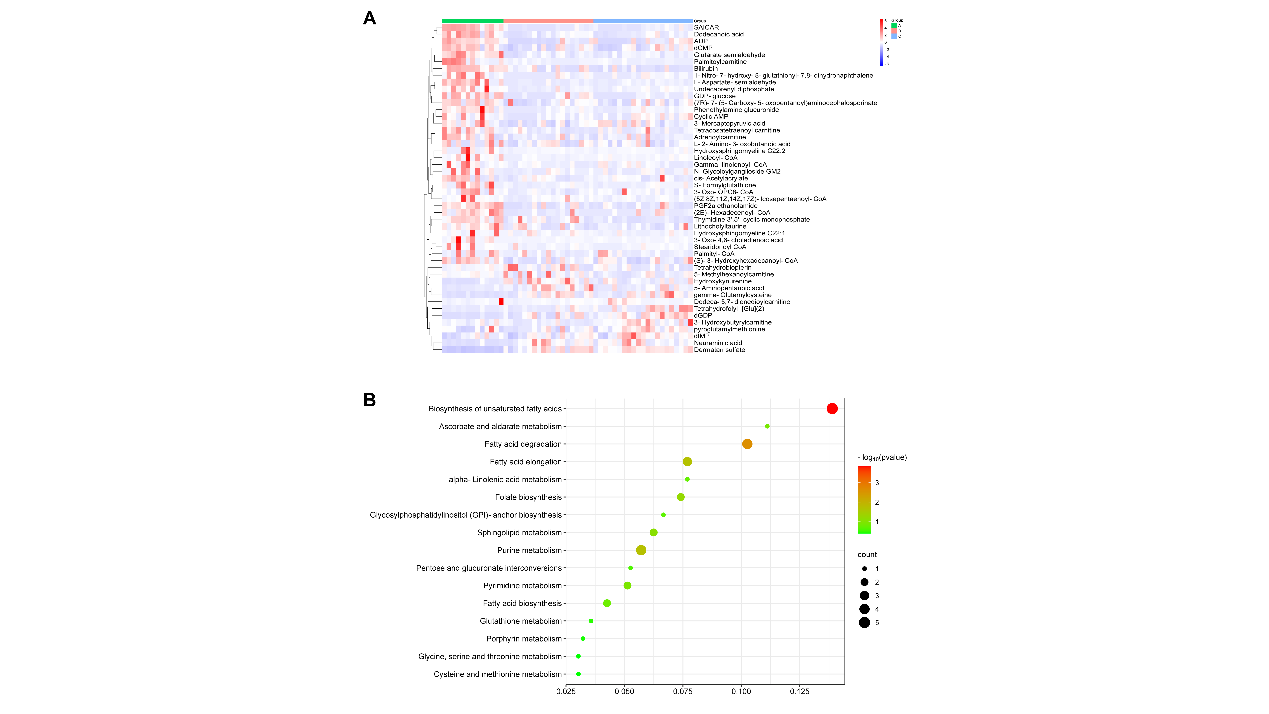


**Figure4**
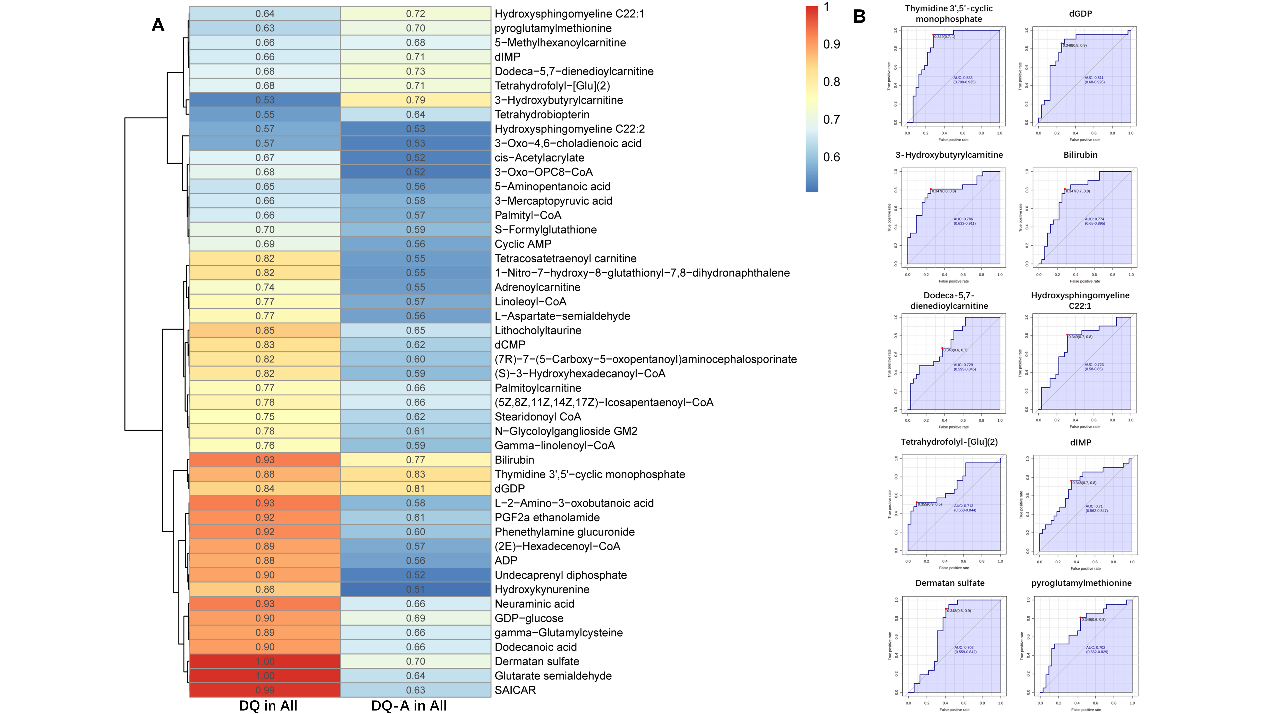


**Figure5**
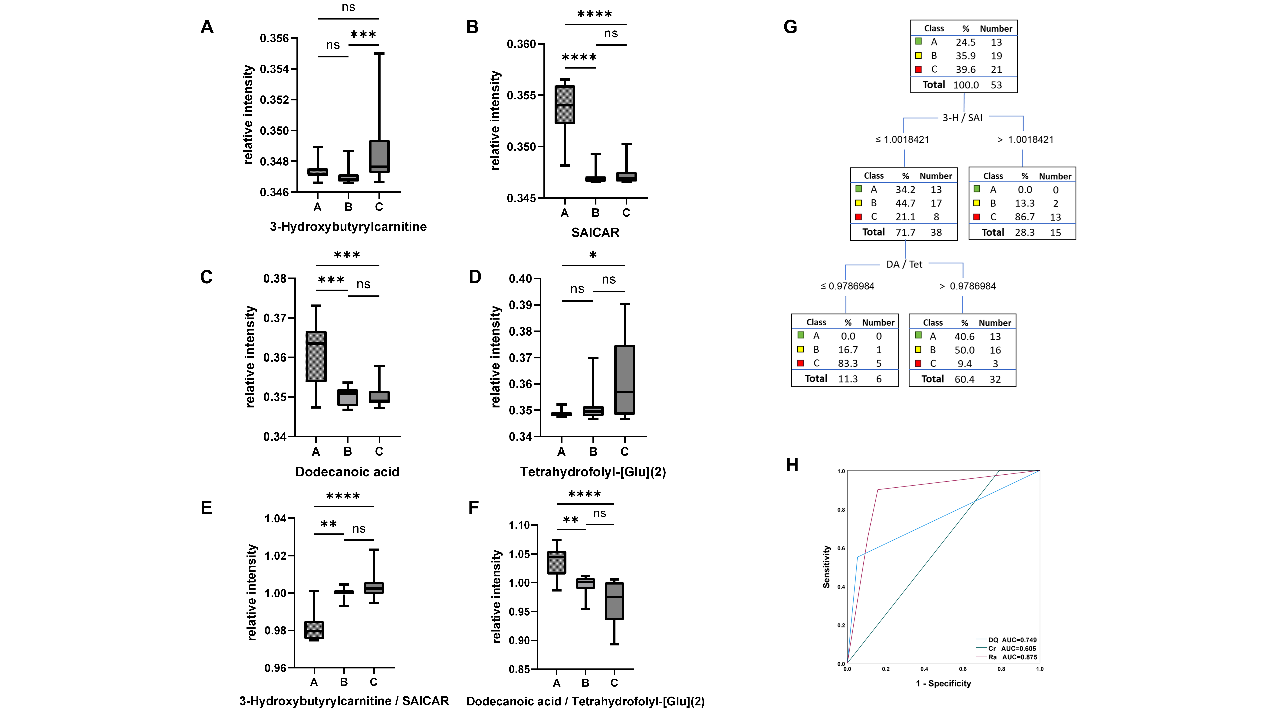

Supplement: Supplementary file 3 [file 643974492fe184f1bcd554c1.docx]
